# Supplementary material for: Steric effect on the self-assembly behaviours of amino acid derivatives
Source: Royal Society of Chemistry journal article supplement (doi:10.1039/c4ra06582d), 2014-10-20
Supplement: c4ra06582d1.pdf [file c4ra06582d1.pdf]

Cite this: DOI: 10.1039/c0xx00000x

www.rsc.org/xxxxxx

ARTICLE TYPE

## Supporting Information

# Steric Effect on the Self-assembly Behaviours of Amino Acid Derivatives

Yulan Fan<sup>a,‡</sup>, Linxiu Cheng<sup>a,‡</sup>, Chunhua Liu<sup>a</sup>, Yunzhi Xie<sup>a</sup>, Wei Liu<sup>a</sup>, Yongdong Li<sup>a</sup>, Xun Li<sup>a</sup>, Yibao Li<sup>a,\*</sup> and Xiaolin Fan<sup>a,\*</sup>

5 Received (in XXX, XXX) Xth XXXXXXXXXX 20XX, Accepted Xth XXXXXXXXXX 20XX

DOI: 10.1039/b000000x

### 1) NMR studies

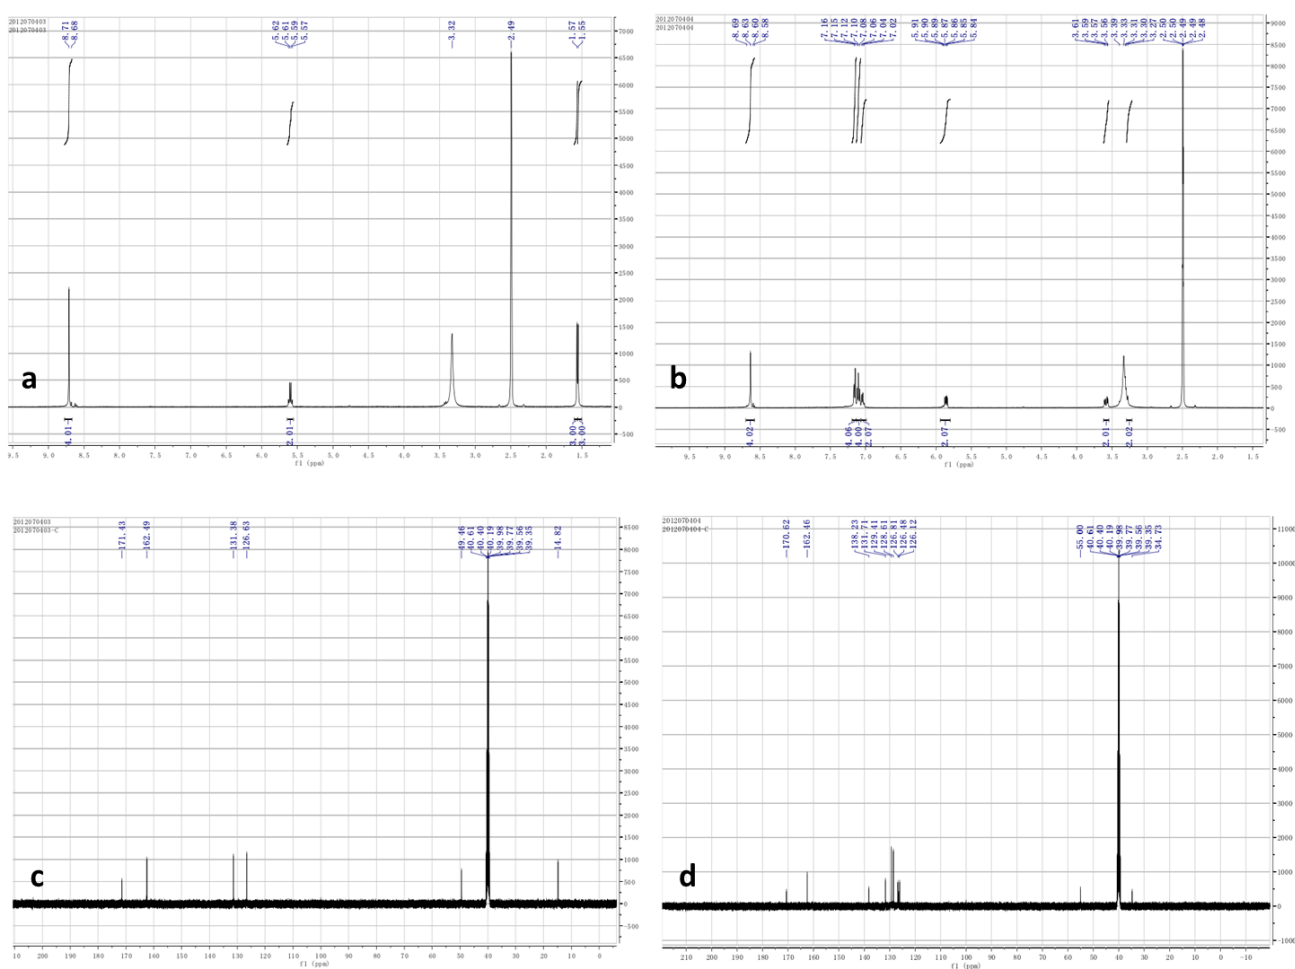

Fig. S1 (a) <sup>1</sup>H NMR spectrum of ANTA; (b) <sup>1</sup>H NMR spectrum of PNTA; (c) <sup>13</sup>C NMR spectrum of ANTA;

10

(d) <sup>13</sup>C NMR spectrum of PNTA.

### 2) FT-IR spectra of ANTA and PNTA

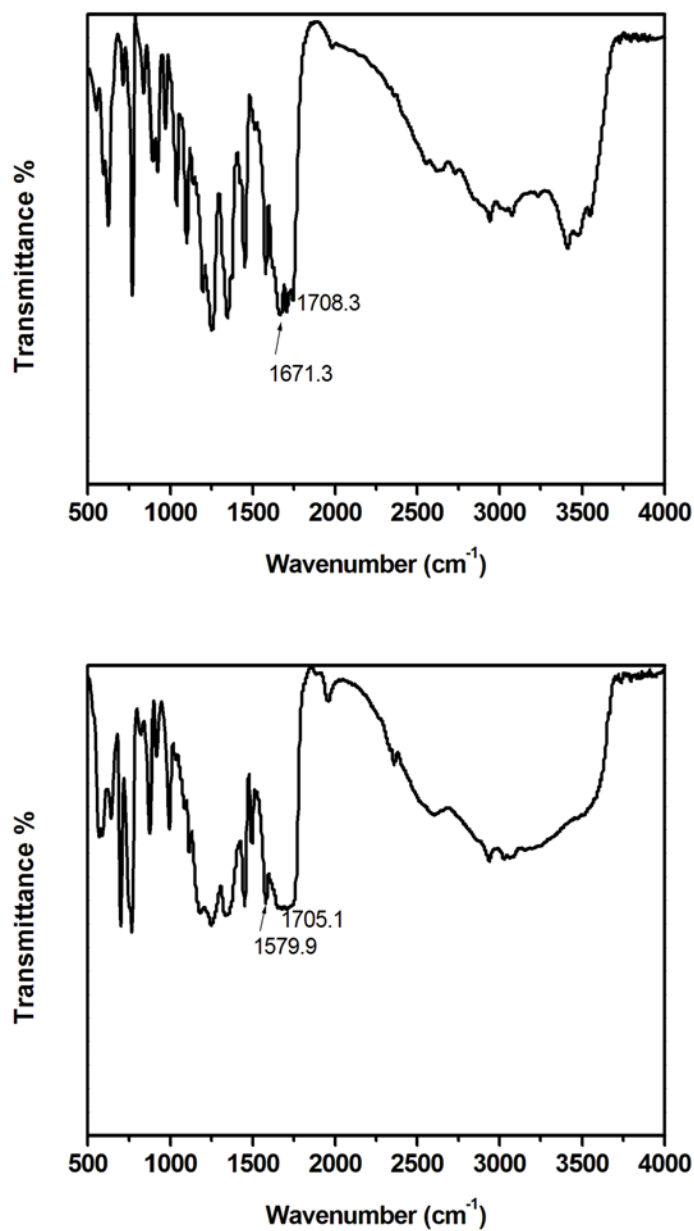

Fig. S2 ( Top) FT-IR spectra of ANTA; (bottom) FT-IR spectra of PNTA

### 3) MS spectra of ANTA and PNTA

Cite this: DOI: 10.1039/c0xx00000x

www.rsc.org/xxxxxx

**ARTICLE TYPE**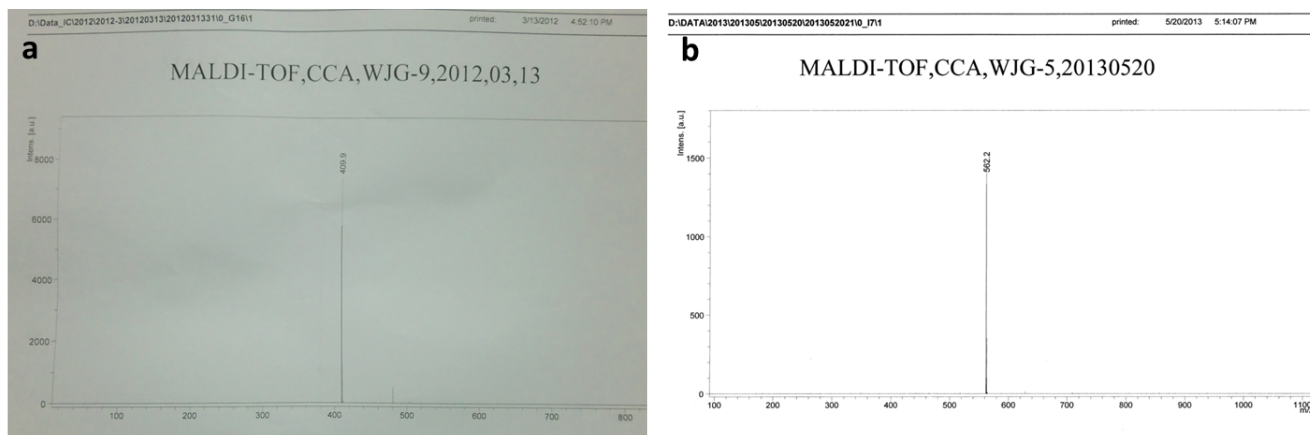**Fig. S3** (a) MS spectrum of ANTA; (b) MS spectrum of PNTA.

#### 4) HPLC chromatogram of ANTA and PNTA

5

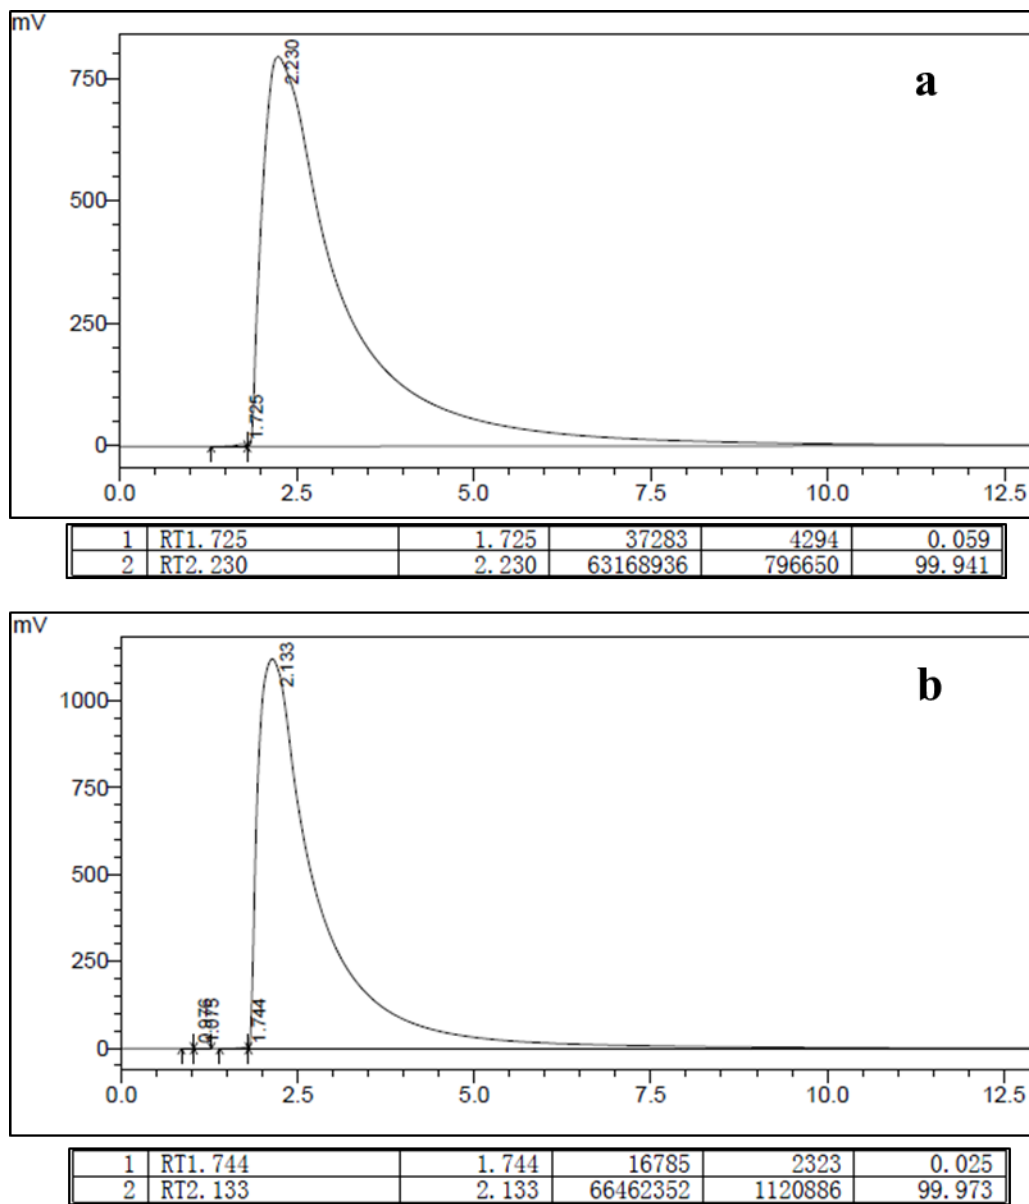

Fig. S4 HPLC chromatogram of compounds: (a) for PNTA and (b) for ANTA.

5

5) Additionnal STM image of PNTA

Cite this: DOI: 10.1039/c0xx00000x

www.rsc.org/xxxxxx

**ARTICLE TYPE**

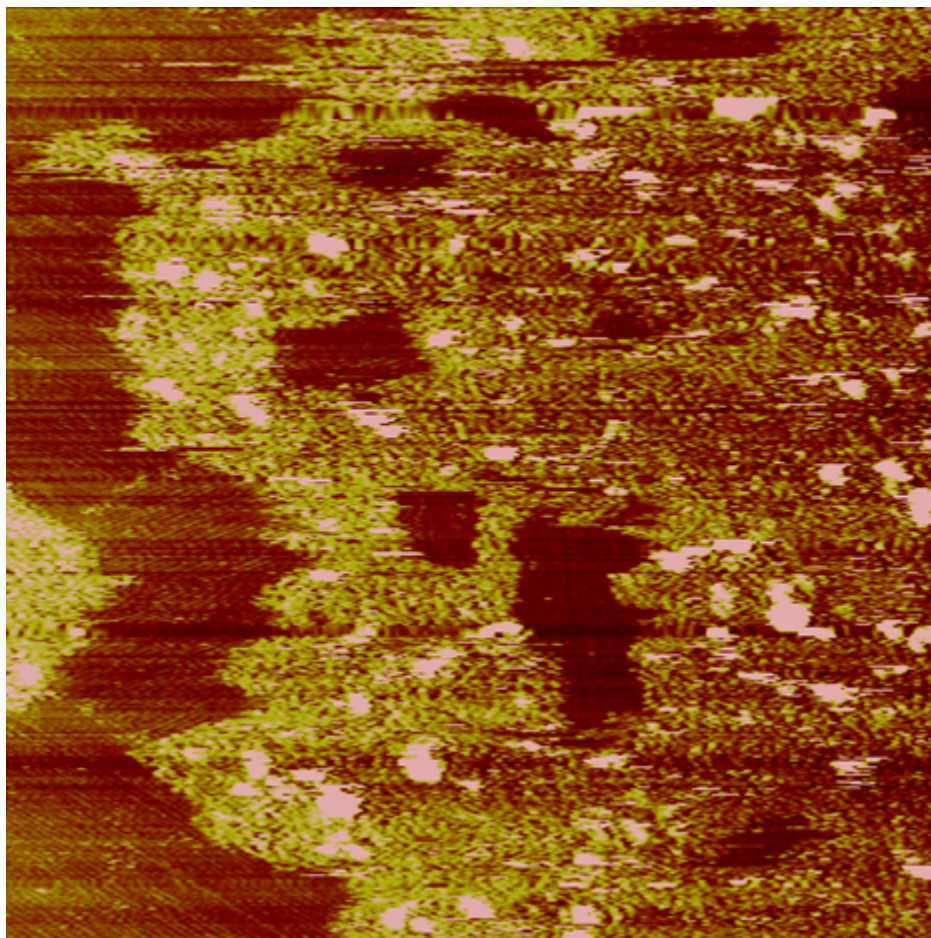

**Fig. S5** ( $68.70 \times 68.70 \text{ nm}^2$ ,  $I_{\text{set}} = 405.9 \text{ nA}$ ,  $V_{\text{bias}} = 360.4 \text{ mV}$ ) showing PNTA molecule disordered arrangement.
